# Supplementary material for: A facile method to synthesize CoV2O6 as a high-performance supercapacitor cathode
Source: Royal Society of Chemistry journal article supplement (doi:10.1039/c8ra10041a), 2019-01-01
Supplement: c8ra10041a1.pdf [file c8ra10041a1.pdf]

## Supplementary Information

### **A Facile Method to Synthesis High Performance $\text{CoV}_2\text{O}_6$ as Supercapacitor**

#### **Cathode**

Xinrui He,<sup>†</sup> Jing Jiang,<sup>†</sup> Hanqing Tian, Yi Niu, Zhipeng Li, Yalin Hu, Jiahao Fan, and Chao Wang\*

State Key Laboratory of Electronic Thin Films and Integrated Devices, School of Electronic Science and Engineering, University of Electronic Science and Technology of China, Chengdu 611731, China. E-mail: [cwang@uestc.edu.cn](mailto:cwang@uestc.edu.cn)

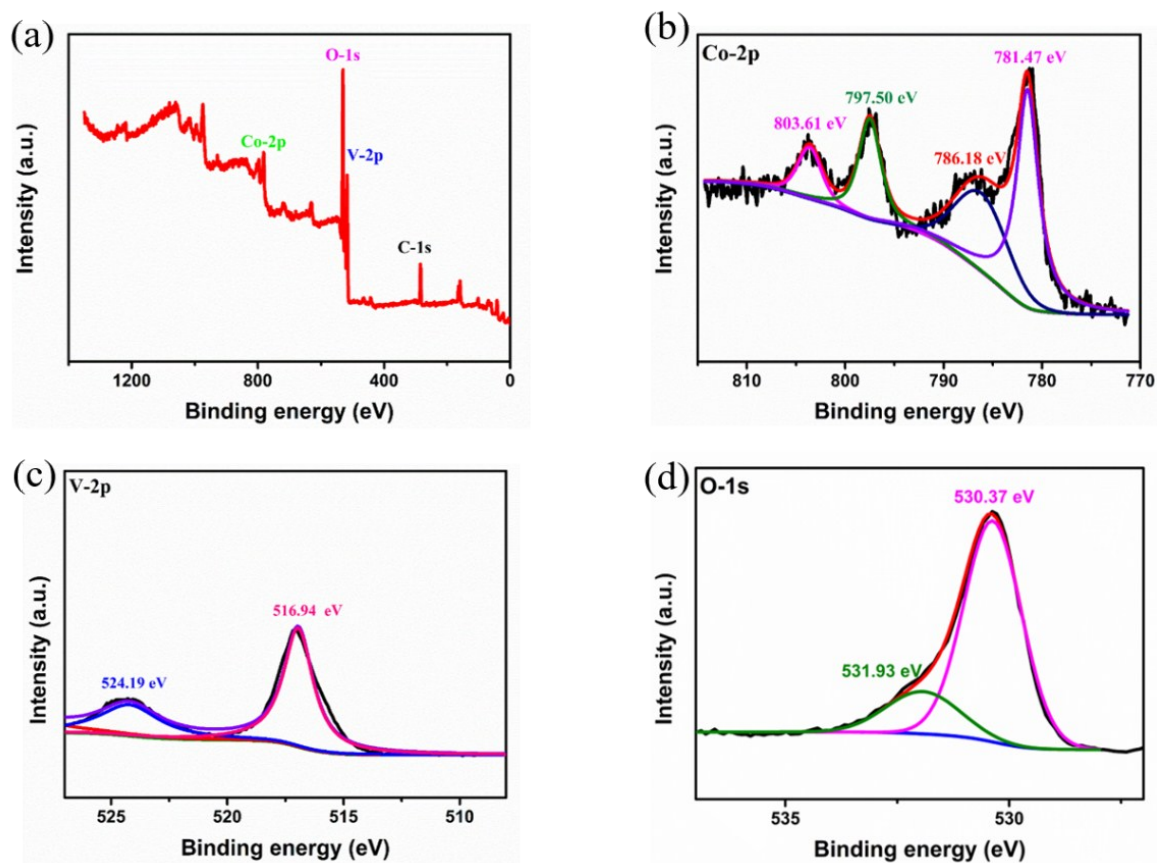

**Fig. S1.** XPS patterns of (a) full scan of the  $\text{CoV}_2\text{O}_6$ . (b) Co 2p, (c) V 2p and (d) O 1s

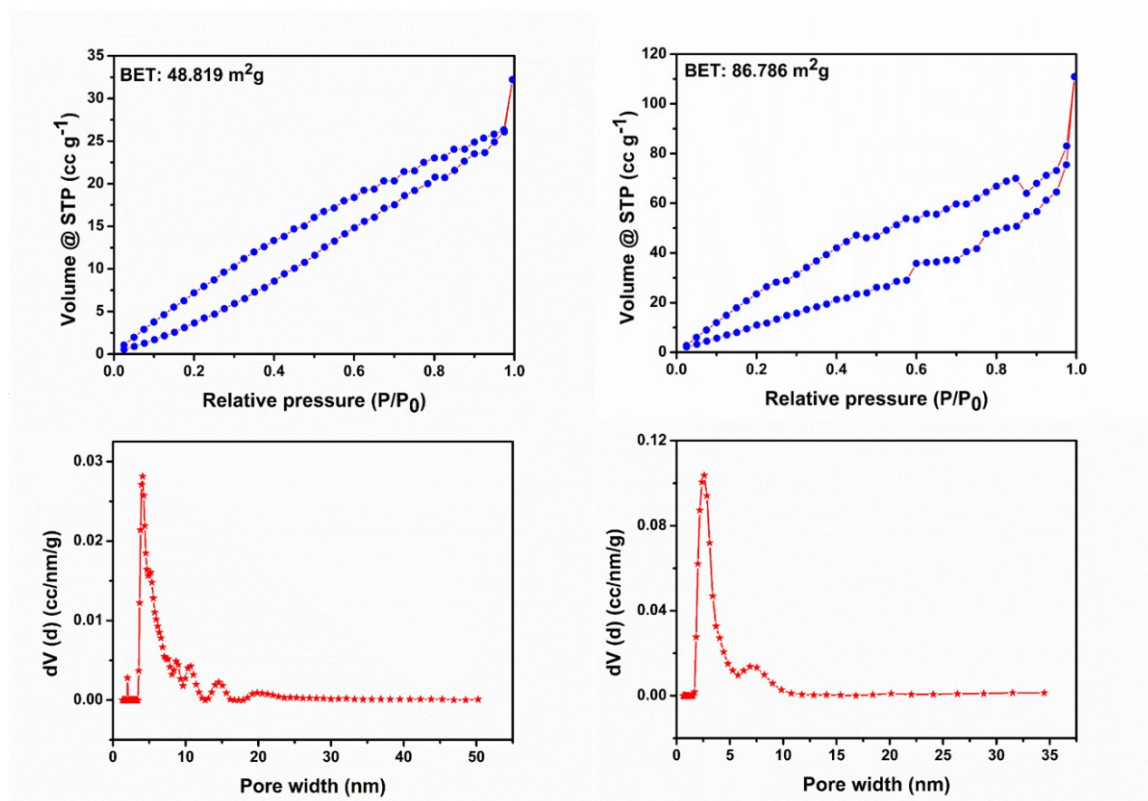

**Fig. S2.** N<sub>2</sub> adsorption and desorption isotherms and the corresponding pore size distributions of (a, c) CoV<sub>2</sub>O<sub>6</sub>•4H<sub>2</sub>O and (b, d) CoV<sub>2</sub>O<sub>6</sub>.

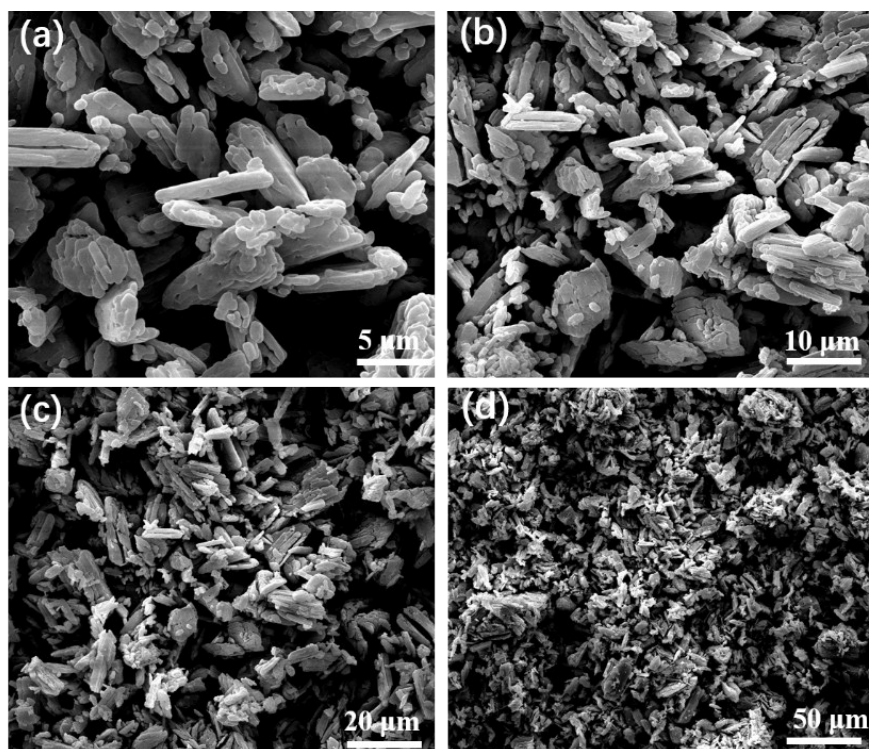

**Fig. S3** SEM images of  $\text{CoV}_2\text{O}_6$

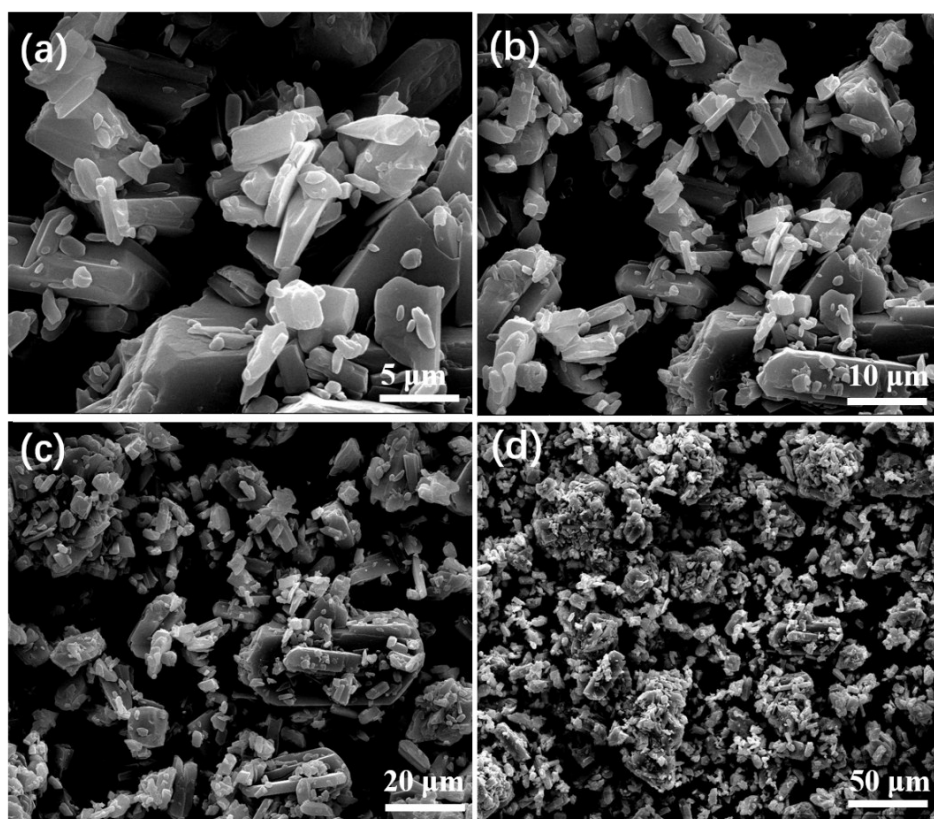

**Fig. S4** SEM images of  $\text{CoV}_2\text{O}_6 \cdot 4\text{H}_2\text{O}$

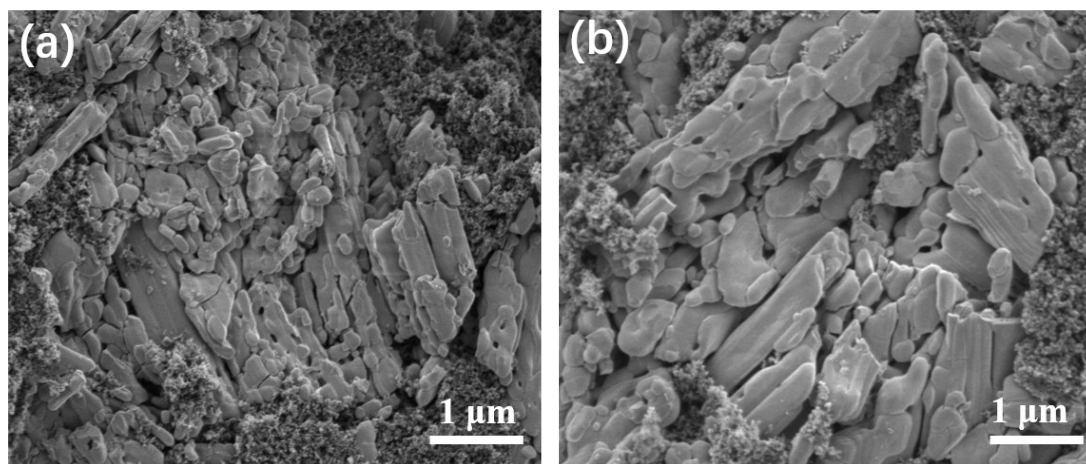

**Fig. S5** SEM patterns of  $\text{CoV}_2\text{O}_6$  after 20,000 cycles

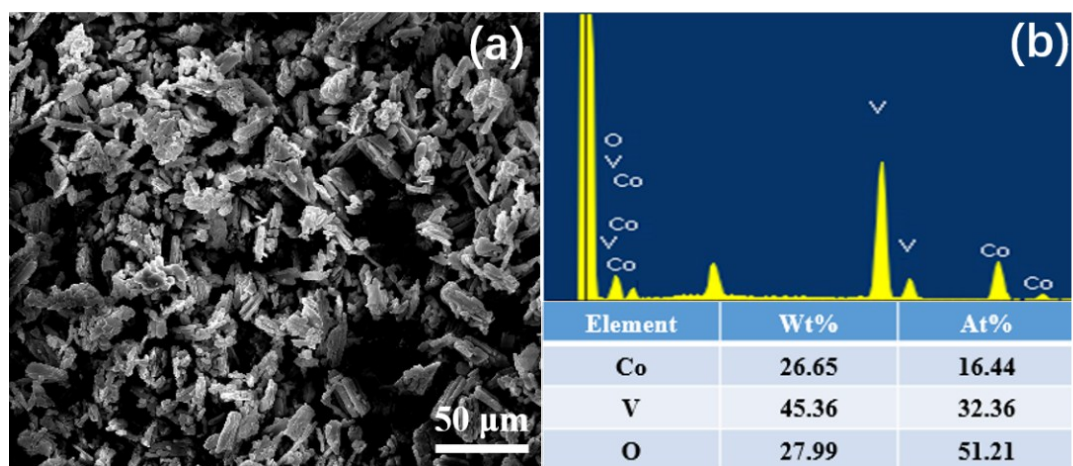

**Fig. S6** EDS spectrum of  $\text{CoV}_2\text{O}_6 \cdot 4\text{H}_2\text{O}$

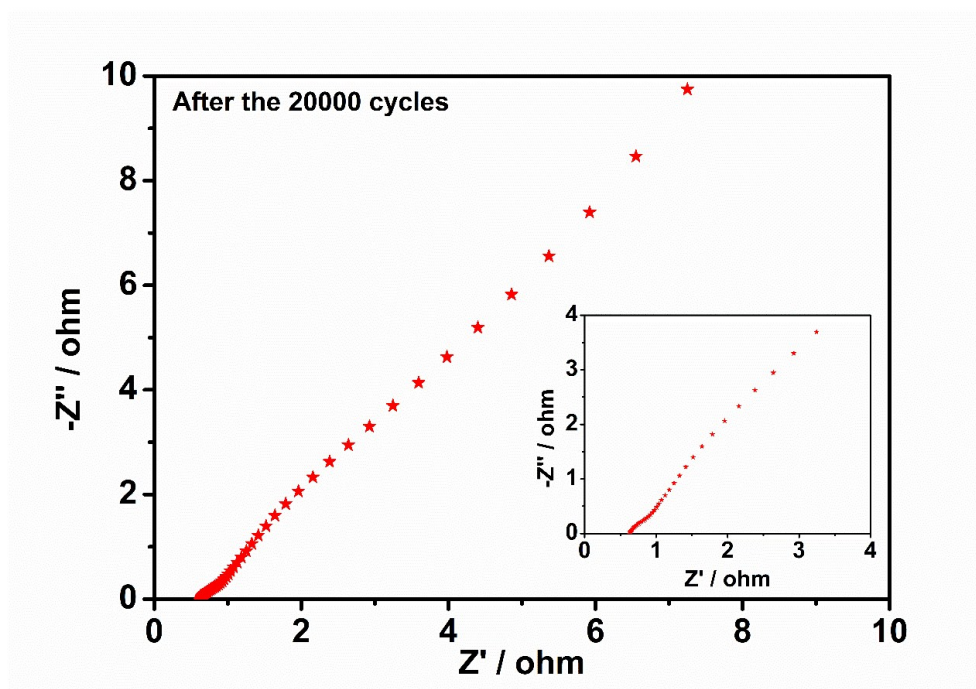

**Fig. S7.** EIS curves of the  $\text{CoV}_2\text{O}_6$  (inset shows the magnified) after 20,000 cycles

**Table S1.** the Element Content of Co and V

| <b>Element</b>    | <b>Co</b> | <b>V</b> |
|-------------------|-----------|----------|
| Element content % | 24.6      | 38.1     |

**Table S2.** A survey of electrochemical performance comparison

| <b>Description</b>                                       | <b>Specific<br/>Capacity<br/>(F g<sup>-1</sup>)</b> | <b>Cycling<br/>Stability<br/>(%)</b> | <b>High Rate<br/>Capacity<br/>(F g<sup>-1</sup>)</b> | <b>Reference</b> |
|----------------------------------------------------------|-----------------------------------------------------|--------------------------------------|------------------------------------------------------|------------------|
| CoV <sub>2</sub> O <sub>6</sub>                          | 306.6 F g <sup>-1</sup><br>at 1 A g <sup>-1</sup>   | 83.30% after<br>20,000 cycles        | 219.2 F g <sup>-1</sup><br>at 20 A g <sup>-1</sup>   | This work        |
| CoV <sub>2</sub> O <sub>6</sub> <sup>1</sup>             | 223 F g <sup>-1</sup> at<br>1 A g <sup>-1</sup>     | 123.3% after<br>15,000 cycles        | none                                                 | [1]              |
| CoV <sub>2</sub> O <sub>6</sub> <sup>2</sup>             | 114.1 F g <sup>-1</sup><br>at 1mA cm <sup>-2</sup>  | 81.91% after<br>1,000 cycles         | none                                                 | [2]              |
| Pristine<br>ZnV <sub>3</sub> O <sub>8</sub> <sup>3</sup> | 219 F g <sup>-1</sup> at<br>0.8 A g <sup>-1</sup>   | none                                 | none                                                 | [3]              |

## References:

1. Y. Wang, H. Chai, H. Dong, J. Xu, D. Jia and W. Zhou, *ACS applied materials & interfaces*, 2016, **8**, 27291-27297.
2. Y. Teng, Y. Li, D. Yu, Y. n. Meng, Y. Wu, X. Zhao and X. Liu, *ChemistrySelect*, 2019, **4**, 956-962.
3. W. H. Low, P. S. Khiew, S. S. Lim, C. W. Siong, C. H. Chia and E. R. Ezeigwe, *Journal of Alloys and Compounds*, 2019.
